# Supplementary material for: Genome Sequencing and Analysis of Trichoderma (Hypocreaceae) Isolates Exhibiting Antagonistic Activity against the Papaya Dieback Pathogen, Erwinia mallotivora
Source: MDPI journal article supplement (doi:10.3390/jof8030246), 2022-02-28
Supplement: s1 [file s1]

# **Genome Sequencing and Analysis of *Trichoderma* (Hypocreaceae) Isolates Exhibiting Antagonistic Activity against the Papaya Dieback Pathogen, *Erwinia mallotivora***

**Amin-Asyraf Tamizi<sup>1</sup>, Noriha Mat-Amin<sup>1</sup>, Jack A. Weaver<sup>2</sup>, Richard T. Olumakaiye<sup>2</sup>, Muhamad Afiq Akbar<sup>3</sup>, Sophie Jin<sup>2</sup>, Hamidun Bunawan<sup>3,\*</sup> and Fabrizio Alberti<sup>2,\*</sup>**

<sup>1</sup> Agri-Omics and Bioinformatics Programme, Biotechnology and Nanotechnology Research Centre, Malaysian Agricultural Research and Development Institute Headquarters (MARDI), 43400 Serdang, Selangor, Malaysia;

<sup>2</sup> School of Life Sciences, University of Warwick, Gibbet Hill Road, Coventry CV4 7AL;

<sup>3</sup> Institute of Systems Biology, Universiti Kebangsaan Malaysia (UKM), 43600 Bangi, Selangor, Malaysia;

\* Correspondence: [hamidun.bunawan@ukm.edu.my](mailto:hamidun.bunawan@ukm.edu.my); [f.alberti@warwick.ac.uk](mailto:f.alberti@warwick.ac.uk)

## **Supplementary Information**

**Table S1.** Concentration of the extracted gDNA measured through Qubit.

| Fungal isolate | DNA Concentration (ng/ $\mu$ l) |
|----------------|---------------------------------|
| RA3a           | 127                             |
| RA5            | 168                             |
| RA6            | 103                             |

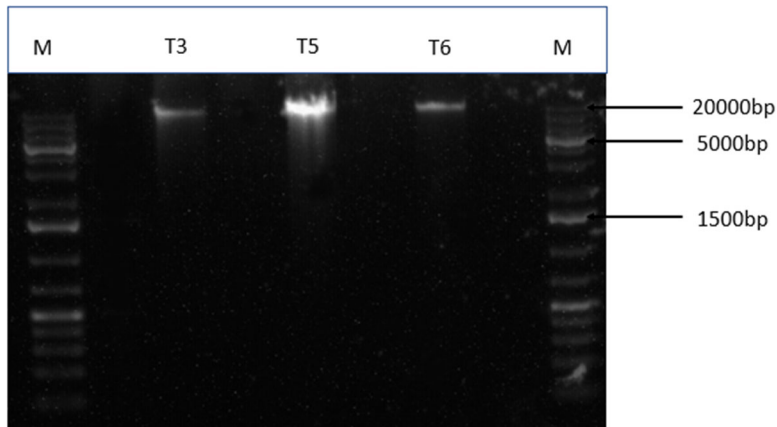

**Figure S1.** HMW genomic DNA of the three *Trichoderma* isolates. Lane M: GeneRuler 1 Kb Plus DNA ladder (Thermo Scientific). Lane T3: 1  $\mu$ L of genomic DNA purified from isolate RA3a. Lane T5: 1  $\mu$ L of genomic DNA purified from isolate RA5. Lane T6: 1  $\mu$ L of genomic DNA purified from isolate RA6.

**Table S2.** Primers and PCR amplicon sizes for molecular identification of isolates.

| Marker                                                     | Forward primer | Primer sequence 5'->3' | Reverse primer | Primer sequence 5'->3' | Amplicon size (bp) | Reference                      |
|------------------------------------------------------------|----------------|------------------------|----------------|------------------------|--------------------|--------------------------------|
| Internal Transcribed Spacer (ITS)                          | ITS1F          | CTTGGTCATTAGAGGAAGTAA  | ITS4           | TCCTCCGCTTATTGATATGC   | 650                | (Schoch et al., 2012)          |
| Translation elongation factor 1 alpha ( <i>tef1</i> ) gene | EF1-728F       | CATCGAGAAGTTCGAGAAGG   | TEF1LLErev     | AACCTGCAGGCAATGTGG     | 1,300              | (Druzhinina and Kubicek, 2005) |
| RNA polymerase B subunit II ( <i>rpb2</i> ) gene           | RPB2-5f        | GAYGAYMGWGATCAYTTYGG   | RPB2-7cR       | CCCATRGCTTGYTTRCCCAT   | 1,200              | (Liu et al., 1999)             |

**Table S3.** Details on the number of predicted non-coding RNAs identified in each genome.

| Non-coding RNA's                     | RA3a         | RA5          | RA6          |
|--------------------------------------|--------------|--------------|--------------|
| <b>Riboswitches</b>                  | 1 (0.30%)    | 1 (0.29%)    | 1 (0.29%)    |
| <b>Ribozymes</b>                     | 2 (0.60%)    | 2 (0.59%)    | 2 (0.57%)    |
| <b>Ribosomal RNAs (rRNA)</b>         | 89 (26.49%)  | 97 (28.53%)  | 101 (29.02%) |
| <b>Small nuclear RNAs (snRNA)</b>    | 9 (2.68%)    | 9 (2.65%)    | 9 (2.59%)    |
| <b>Small nucleolar RNAs (snoRNA)</b> | 31 (9.23%)   | 28 (8.24%)   | 30 (8.62%)   |
| <b>Small RNAs (sRNA)</b>             | 4 (1.19%)    | 4 (1.18%)    | 4 (1.15%)    |
| <b>Transfer RNAs (tRNA)</b>          | 195 (58.04%) | 193 (56.76%) | 196 (56.32%) |
| <b>Other</b>                         | 5 (1.49%)    | 5 (1.47%)    | 5 (1.44%)    |
| <b>intron</b>                        | 0            | 1 (0.29%)    | 0            |

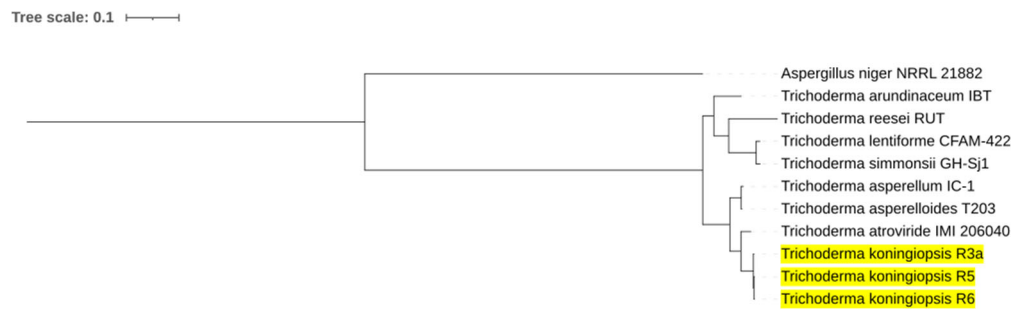

**Figure S2.** Phylogenomic tree from alignment of 3,392 single-copy orthologous proteins from selected *Trichoderma* spp. The three isolates sequenced in the present work are highlighted in yellow. Bootstrap values were omitted from the tree as all the branches showed 100% bootstrap value.

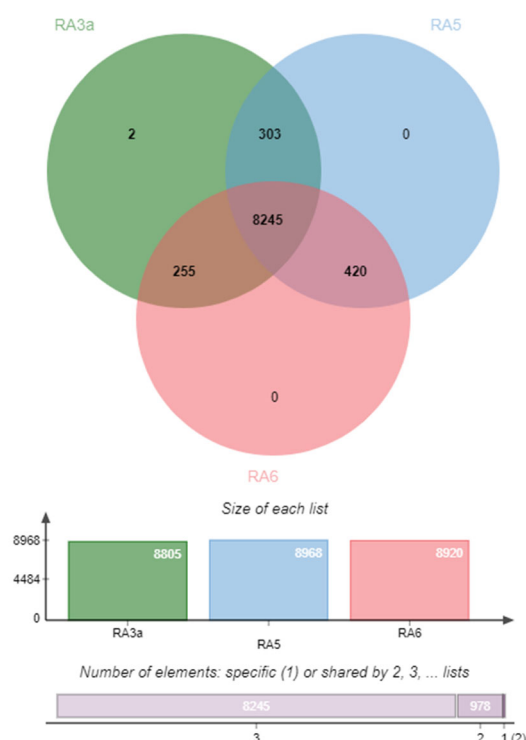

**Figure S3.** Shared and unique orthologous protein group among isolates sequenced in this study as inferred from OrthoVenn2 web server analysis.

**Table S4.** Distribution of predicted BGCs found across the fungal genomes.

| Gene Type          | Fungal Genome | Region | Span      |           | Cluster size (kb) | Most similar BGC according to AntiSMASH (% indicates the proportion of genes with similarities) |
|--------------------|---------------|--------|-----------|-----------|-------------------|-------------------------------------------------------------------------------------------------|
|                    |               |        | From      | To        |                   |                                                                                                 |
| Hybrid PKS/NRPS    | RA3a          | 2.1    | 83,384    | 178,034   | 94.6              | fusaric acid, 41% (5/12)                                                                        |
|                    | RA5           | 7.3    | 3,470,945 | 3,555,885 | 84.9              | fusaric acid, 50% (6/12)                                                                        |
|                    | RA6           | 4.4    | 3,796,740 | 3,881,680 | 84.9              | fusaric acid, 50% (6/12)                                                                        |
| PKS                | RA3a          | 6.1    | 78,041    | 120,092   | 42                | naphthopyrone, 100% (1/1)                                                                       |
|                    | RA5           | 5.9    | 3,799,152 | 3,841,850 | 42.6              | naphthopyrone, 100% (1/1)                                                                       |
|                    | RA6           | 5..9   | 3,806,331 | 3,849,029 | 42.6              | naphthopyrone, 100% (1/1)                                                                       |
| PKS                | RA3a          | 6.3    | 725,578   | 749,075   | 23.4              | neurosporin A, 100% (1/1)                                                                       |
|                    | RA5           | 5.8    | 3,170,168 | 3,193,667 | 23.5              | neurosporin A, 100% (1/1)                                                                       |
|                    | RA6           | 5.8    | 3,180,784 | 3,200,851 | 20.0              | neurosporin A, 100% (1/1)                                                                       |
| Hybrid PKS/Terpene | RA3a          | 9.1    | 464,928   | 537,653   | 72.7              | ascochlorin, 38% (3/8)                                                                          |
|                    | RA5           | 1.6    | 6,455,881 | 6,532,090 | 76.2              | ascochlorin, 38% (3/8)                                                                          |
|                    | RA6           | 8.4    | 1,744,822 | 1,821,031 | 76.2              | ascochlorin, 38% (3/8)                                                                          |
| Terpene            | RA3a          | 9.2    | 636,393   | 658,750   | 22.3              | clavaric acid, 100% (1/1)                                                                       |
|                    | RA5           | 1.4    | 6,335,790 | 6,356,639 | 20.8              | clavaric acid, 100% (1/1)                                                                       |
|                    | RA6           | 8.3    | 1,623,721 | 1,646,078 | 22.3              | clavaric acid. 100% (1/1)                                                                       |

**Table S5.** Putative salicylaldehyde cluster found across the three sequenced fungal genomes.

| Gene Locus                          | Homologue (% Identity/% similarity), Organism, Accession number                                          | Proposed function                   |
|-------------------------------------|----------------------------------------------------------------------------------------------------------|-------------------------------------|
| RA3a_007616, RA5_007274, RA6_006441 | Highly reducing polyketide synthase <i>virA</i> , 84%/92%, <i>Trichoderma virens</i> Gv29-8, G9N4B2.1    | Biosynthesis of the polyketide unit |
| RA3a_007617, RA5_007273, RA6_006440 | Short-chain dehydrogenase <i>virB</i> , 75%/81%, <i>Trichoderma virens</i> Gv29-8, G9N4B1.1              | Tailoring of the scaffold           |
| RA3a_007618, RA5_007272, RA6_006439 | Cupin-domain-containing oxidoreductase <i>virC</i> , 88%/95%, <i>Trichoderma virens</i> Gv29-8, G9N4B0.1 |                                     |
| RA5_007271                          | Short-chain dehydrogenase <i>virD</i> , 62%/67%, <i>Trichoderma virens</i> Gv29-8, G9N4A9.1              |                                     |
| RA3a_007619, RA5_007270, RA6_006438 | Cytochrome P450 monooxygenase <i>virE</i> , 74%/83%, <i>Trichoderma virens</i> Gv29-8, G9N4A8.1          |                                     |
| RA3a_007620, RA5_007269, RA6_006437 | Adenylosuccinate lyase, 49%/63%, <i>Saccharomyces cerevisiae</i> S288C, Q05911.1                         |                                     |
| RA3a_007621, RA5_007268, RA6_006436 | Probable oxidoreductase <i>virH</i> , 81%/89%, <i>Trichoderma virens</i> Gv29-8] Sequence ID: G9N4A5.1   |                                     |
| RA3a_007622, RA5_007267, RA6_006435 | Glutamine--tRNA ligase protein <i>virJ</i> , 90%/93%, <i>Trichoderma virens</i> Gv29-8 G9N4A3.1          |                                     |
| RA3a_007623, RA5_007266             | FAD-linked oxidoreductase <i>virF</i> , 59%/73%, <i>Trichoderma virens</i> Gv29-8, G9N4A7.1              |                                     |

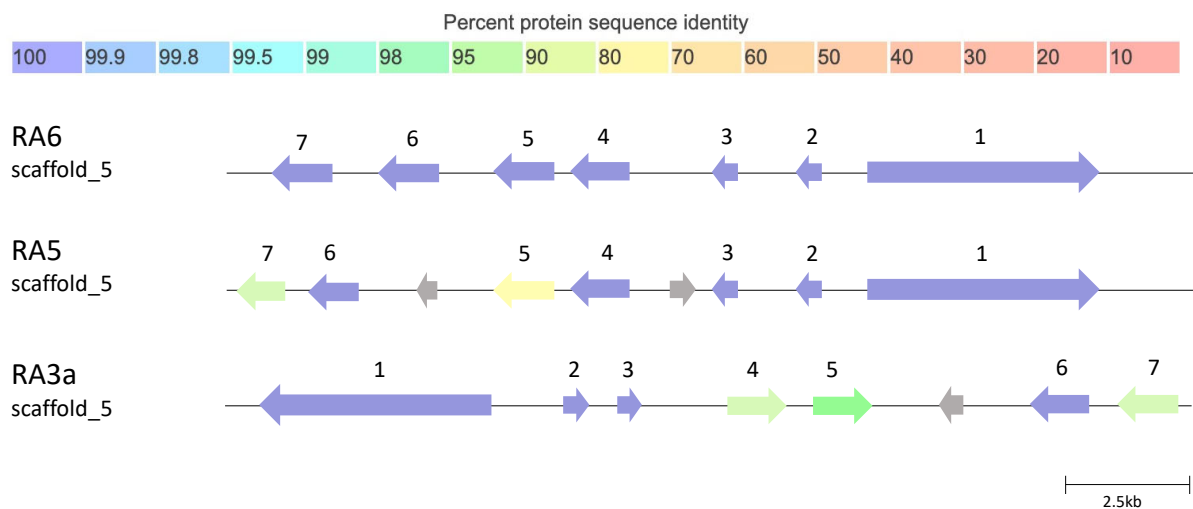

**Figure S4.** Protein sequence comparison of the putative salicylaldehyde cluster found in the genome of strains RA6, RA5, and RA3a. The proteome comparison service from PATRIC

3.6.12 (Davis et al., 2020) was used to carry out protein sequence comparison using bi-directional BLASTP. Default parameters were used; i.e Minimum % coverage was set to 30%, BLAST E value was set to 1e-5 and Minimum % Identity was set to 10%. The protein sequence of the RA6 cluster was used as a reference sequence to be compared to the RA5 cluster and the RA3a cluster. The sequences shown in grey are sequences that did not show any similarity between clusters. Key: 1, HR-PKS; 2, Short chain dehydrogenase; 3: Cupin-domain-containing oxidoreductase; 4, Cytochrome P450; 5, Lyase; 6, Oxidoreductase; 7, Oxidoreductase.

## References

- Davis, J.J., Wattam, A.R., Aziz, R.K., Brettin, T., Butler, R., Butler, R.M., Chlenski, P., Conrad, N., Dickerman, A., Dietrich, E.M., Gabbard, J.L., Gerdes, S., Guard, A., Kenyon, R.W., Machi, D., Mao, C., Murphy-Olson, D., Nguyen, M., Nordberg, E.K., Olsen, G.J., Olson, R.D., Overbeek, J.C., Overbeek, R., Parrello, B., Pusch, G.D., Shukla, M., Thomas, C., VanOeffelen, M., Vonstein, V., Warren, A.S., Xia, F., Xie, D., Yoo, H., Stevens, R., 2020. The PATRIC Bioinformatics Resource Center: expanding data and analysis capabilities. *Nucleic Acids Res.* 8, D606-D612. doi: 10.1093/nar/gkz943.
- Druzhinina, I., Kubicek, C.P., 2005. Species concepts and biodiversity in *Trichoderma* and *Hypocrea*: From aggregate species to species clusters. *J. Zhejiang Univ. Sci. B*, 100–112. <https://doi.org/10.1631/jzus.2005.B0100>
- Liu, Y.J., Whelen, S., Hall, B.D., 1999. Phylogenetic relationships among ascomycetes: Evidence from an RNA polymerase II subunit. *Mol. Biol. Evol.* 16, 1799–1808. <https://doi.org/10.1093/oxfordjournals.molbev.a026092>
- Schoch, C.L., Seifert, K.A., Huhndorf, S., Robert, V., Spouge, J.L., Levesque, C.A., Chen, W., Bolchacova, E., Voigt, K., Crous, P.W., Miller, A.N., Wingfield, M.J., Aime, M.C., An, K.D., Bai, F.Y., Barreto, R.W., Begerow, D., Bergeron, M.J., Blackwell, M., Boekhout, T., Bogale, M., Boonyuen, N., Burgaz, A.R., Buyck, B., Cai, L., Cai, Q., Cardinali, G., Chaverri, P., Coppins, B.J., Crespo, A., Cubas, P., Cummings, C., Damm, U., de Beer, Z.W., de Hoog, G.S., Del-Prado, R., Dentinger, B., Diéguez-Urbeondo, J., Divakar, P.K., Douglas, B., Dueñas, M., Duong, T.A., Eberhardt, U., Edwards, J.E., Elshahed, M.S., Fliegerova, K., Furtado, M., García, M.A., Ge, Z.W., Griffith, G.W., Griffiths, K., Groenewald, J.Z., Groenewald, M., Grube, M., Gryzenhout, M., Guo, L.D., Hagen, F., Hambleton, S., Hamelin, R.C., Hansen, K., Harrold, P., Heller, G., Herrera, C., Hirayama, K., Hirooka, Y., Ho, H.M., Hoffmann, K., Hofstetter, V., Högnabba, F., Hollingsworth, P.M., Hong, S.B., Hosaka, K., Houbaken, J., Hughes, K., Huhtinen, S., Hyde, K.D., James, T., Johnson, E.M., Johnson, J.E., Johnston, P.R., Jones, E.B.G., Kelly, L.J., Kirk, P.M., Knapp, D.G., Kõljalg, U., Kovács, G.M., Kurtzman, C.P., Landvik, S., Leavitt, S.D., Ligginstoffer, A.S., Liimatainen, K., Lombard, L., Luangsa-ard, J.J., Lumbsch, H.T., Maganti, H., Maharachchikumbura, S.S.N., Martin, M.P., May, T.W., McTaggart, A.R., Methven, A.S., Meyer, W., Moncalvo, J.M., Mongkolsamrit, S., Nagy, L.G., Nilsson, R.H., Niskanen, T., Nyilasi, I., Okada, G., Okane, I., Olariaga, I., Otte, J., Papp, T., Park, D., Petkovits, T., Pino-Bodas, R., Quaedvlieg, W., Raja, H.A., Redecker, D., Rintoul, T.L., Ruibal, C., Sarmiento-Ramírez, J.M., Schmitt, I., Schüßler, A., Shearer, C., Sotome, K., Stefani, F.O.P., Stenroos, S., Stielow, B., Stockinger, H., Suetrong, S., Suh, S.O., Sung, G.H., Suzuki, M., Tanaka, K., Tedersoo, L., Telleria, M.T., Tretter, E., Untereiner, W.A., Urbina,

H., Vágvölgyi, C., Vialle, A., Vu, T.D., Walther, G., Wang, Q.M., Wang, Y., Weir, B.S., Weiß, M., White, M.M., Xu, J., Yahr, R., Yang, Z.L., Yurkov, A., Zamora, J.C., Zhang, N., Zhuang, W.Y., Schindel, D., 2012. Nuclear ribosomal internal transcribed spacer (ITS) region as a universal DNA barcode marker for Fungi. *Proc. Natl. Acad. Sci. U. S. A.* 109, 6241–6246. <https://doi.org/10.1073/pnas.1117018109>
